# Supplementary material
Source: ML conference proceedings conference paper supplement (https://proceedings.mlr.press/v89/abbasi-yadkori19a.html)
Supplement: Supplementary file [file abbasi-yadkori19a-supp.pdf]

## A Value function estimation

### A.1 Proof of Lemma 4.1

To see the identity

$$P_{\Phi}(\Phi - \bar{\Phi}_+ + \mathbf{W})(h - \hat{h}) = \Phi(I - \Gamma \otimes \Gamma)^{\top} \text{VEC}(h - \hat{h}), \quad (13)$$

note that a single element of the vector  $(\Phi - \bar{\Phi}_+ + W)(h - \hat{h})$  can be expressed as

$$(\phi - \mathbf{E}(\phi_+) + \text{VEC}(W))^{\top} (h - \hat{h}) = \text{VEC}(xx^{\top} - \Gamma xx^{\top} \Gamma^{\top})^{\top} (h - \hat{h}) = \text{VEC}(xx^{\top})^{\top} (I - \Gamma \otimes \Gamma)^{\top} (h - \hat{h}), \quad (14)$$

where we have used the Kronecker product identity  $\text{VEC}(\Gamma X \Gamma^{\top}) = (\Gamma \otimes \Gamma) \text{VEC}(X)$ . Thus we have that

$$\left\| \Phi(I - \Gamma \otimes \Gamma)^{\top} (h - \hat{h}) \right\| \leq \left\| P_{\Phi}(\bar{\Phi}_+ - \Phi_+) \hat{h} \right\|. \quad (15)$$

Next we lower-bound  $\left\| (I - \Gamma \otimes \Gamma)^{\top} (h - \hat{h}) \right\|$ . Let  $L = H^{1/2} \Gamma H^{-1/2}$  and let  $\bar{H} = I - H^{-1/2} \hat{H} H^{-1/2}$ . We have the following:

$$\begin{aligned} \left\| (I - \Gamma \otimes \Gamma)^{\top} \text{VEC}(H - \hat{H}) \right\| &= \left\| H - \hat{H} - \Gamma^{\top} (H - \hat{H}) \Gamma \right\|_F \\ &= \left\| H^{1/2} (\bar{H} - L^{\top} \bar{H} L) H^{1/2} \right\|_F \\ &= \sqrt{\text{tr}(H(\bar{H} - L^{\top} \bar{H} L) H (\bar{H} - L^{\top} \bar{H} L))} \\ &\geq \lambda_{\min}(H) \left\| \bar{H} - L^{\top} \bar{H} L \right\|_F \\ &\geq \lambda_{\min}(M) \left\| \bar{H} - L^{\top} \bar{H} L \right\|_F. \end{aligned}$$

where the second-last inequality follows from the fact that  $\text{tr}(AB) \geq \lambda_{\min}(A) \text{tr}(B)$  for p.s.d matrices  $A$  and  $B$  (Zhang and Zhang, 2006). Furthermore, using the fact that  $\|L\|^2 \leq 1 - \lambda_{\min}(M) \|H\|^{-1}$ ,<sup>3</sup>

$$\begin{aligned} \left\| \bar{H} - L^{\top} \bar{H} L \right\|_F &= \left\| (I - L \otimes L)^{\top} \text{VEC}(\bar{H}) \right\| \\ &\geq (1 - \|L\|^2) \left\| \bar{H} \right\|_F \\ &\geq \frac{\lambda_{\min}(M)}{\|H\|} \left\| I - H^{-1/2} \hat{H} H^{-1/2} \right\|_F \\ &= \frac{\lambda_{\min}(M)}{\|H\|} \sqrt{\text{tr}(H^{-1}(H - \hat{H}) H^{-1}(H - \hat{H}))} \\ &\geq \lambda_{\min}(M) \|H\|^{-2} \left\| H - \hat{H} \right\|_F. \end{aligned}$$

Hence we get that

$$\left\| (I - \Gamma \otimes \Gamma)^{\top} (h - \hat{h}) \right\| \geq \lambda_{\min}(M)^2 \|H\|^{-2} \left\| H - \hat{H} \right\|_F. \quad (16)$$

### A.2 Proof of Lemma 4.2

*Proof.* Let  $P_{\Psi} = \Psi(\Psi^{\top} \Psi)^{-1} \Psi$  be the orthogonal projector onto  $\Psi$ . The true parameters  $g = \text{VEC}(G)$  and the estimate  $\hat{g} = \text{VEC}(\hat{G})$  satisfy the following:

$$\Psi \hat{g} = P_{\Psi}(\mathbf{c} + (\bar{\Phi}_+ - \mathbf{W}) \hat{h}) \quad (17)$$

$$\Psi g = \mathbf{c} + (\bar{\Phi}_+ - \mathbf{W}) h \quad (18)$$

Subtracting the above equations, we have

$$\left\| \Psi g - \Psi \hat{g} \right\| = \left\| P_{\Psi}((\bar{\Phi}_+ - \mathbf{W})(h - \hat{h}) + (\bar{\Phi}_+ - \Phi_+) \hat{h}) \right\|$$

<sup>3</sup>This can be seen by multiplying the equation  $H \succ \Gamma^{\top} H \Gamma + \lambda_{\min}(M) I$  by  $H^{-1/2}$  on both sides.

$$\leq \left\| (\bar{\Phi}_+ - \mathbf{W})(h - \hat{h}) \right\| + \left\| P_{\Psi}(\bar{\Phi}_+ - \Phi_+)\hat{h} \right\|.$$

Using  $\|\Psi v\| \geq \sqrt{\lambda_{\min}(\Psi^\top \Psi)} \|v\|$  on the l.h.s., and  $\|P_{\Psi} v\| \leq \|\Psi^\top v\| / \sqrt{\lambda_{\min}(\Psi^\top \Psi)}$  on the r.h.s.,

$$\left\| G - \hat{G} \right\|_F = \|g - \hat{g}\| \leq \frac{\left\| (\bar{\Phi}_+ - \mathbf{W})(h - \hat{h}) \right\|}{\sqrt{\lambda_{\min}(\Psi^\top \Psi)}} + \frac{\left\| \Psi^\top (\bar{\Phi}_+ - \Phi_+)\hat{h} \right\|}{\lambda_{\min}(\Psi^\top \Psi)}. \quad (19)$$

Using similar arguments as for  $\lambda_{\min}(\Phi^\top \Phi)$  and the fact that actions are randomly sampled, it can be shown that  $\lambda_{\min}(\Psi^\top \Psi) = O(\tau)$ .

Let  $\Sigma_{G,\pi} = A\Sigma_\pi A^\top + B\Sigma_a B^\top$ . Assuming that we are close to steady state  $x \sim \mathcal{N}(0, \Sigma_\pi)$  each time we take a random action  $a \sim \mathcal{N}(0, \Sigma_a)$ , the next state is distributed as  $x_+ \sim \mathcal{N}(0, \Sigma_{G,\pi} + W)$ . Therefore each element of  $(\bar{\Phi}_+ - \mathbf{W})(h - \hat{h})$  is bounded as:

$$\begin{aligned} |(\mathbf{E}(\phi_+) - \text{VEC}(W))^\top (h - \hat{h})| &= |\text{tr}(\Sigma_{G,\pi}(H - \hat{H}))| \\ &\leq \text{tr}(\Sigma_{G,\pi}) \left\| H - \hat{H} \right\|, \end{aligned}$$

where we have used the fact that  $|\text{tr}(M_1 M_2)| \leq \|M_1\| \text{tr}(M_2)$  for real-valued square matrices  $M_1$  and  $M_2 \succ 0$  (see e.g. (Zhang and Zhang, 2006)). Thus, the first term of (19) is bounded as

$$\left\| (\bar{\Phi}_+ - \mathbf{W})(h - \hat{h}) \right\| \leq \text{tr}(\Sigma_{G,\pi}) \left\| H - \hat{H} \right\| \sqrt{\tau}. \quad (20)$$

To bound the second term, we can again use Lemma 4.8 of Tu and Recht (2017), where the only changes are that we bound  $\max_t \|\psi_t\|$  as opposed to  $\max_t \|\phi_t\|$ , and that we have a different distribution of next-state vectors  $x_+$ . Thus, with probability at least  $1 - \delta$ , the second term scales as

$$\left\| \Psi^\top (\bar{\Phi}_+ - \Phi_+)\hat{h} \right\| = O\left(\sqrt{\tau} \left\| W \hat{H} \right\|_F (\text{tr}(\Sigma_\pi) + \text{tr}(\Sigma_a)) \|\Sigma_{G,\pi}\|_F \text{polylog}(n^2, 1/\delta, \tau)\right). \quad (21)$$

□

## B Analysis of the MFLQ algorithm

### B.1 Proof of Lemma 5.1

*Proof.* Let  $G^j = \frac{1}{j} \sum_{i=1}^j G_i$  and  $\hat{G}^j = \frac{1}{j} \sum_{i=1}^j \hat{G}_i$  be the averages of true and estimated state-action value matrices of policies  $K_1, \dots, K_j$ , respectively. Let  $H^j$  and  $\hat{H}^j$  be the corresponding value matrices. The greedy policy with respect to  $\hat{G}^j$  is given by:

$$\begin{aligned} K_{j+1} &= \arg \min_K \text{tr} \left( x^\top \begin{bmatrix} I & -K^\top \end{bmatrix} \hat{G}^j \begin{bmatrix} I \\ -K \end{bmatrix} x \right) \\ &= \arg \min_K \text{tr} \left( \hat{G}^j X_K \right), \end{aligned} \quad (22)$$

$$\text{where } X_K = \begin{bmatrix} I \\ -K \end{bmatrix} x x^\top \begin{bmatrix} I & -K^\top \end{bmatrix}. \quad (23)$$

Let  $|X_K|$  be the matrix obtained from  $X_K$  by taking the absolute value of each entry. We have the following:

$$\text{tr}(G_j X_{K_{j+1}}) \leq \text{tr}(\hat{G}_j X_{K_{j+1}}) + \varepsilon_1 \text{tr}(\mathbf{1}\mathbf{1}^\top |X_{K_{j+1}}|) \quad (24)$$

$$\leq \text{tr}(\hat{G}_j X_{K_j}) + \varepsilon_1 \mathbf{1}^\top |X_{K_{j+1}}| \mathbf{1} \quad (25)$$

$$\leq \text{tr}(G_j X_{K_j}) + \varepsilon_1 \mathbf{1}^\top (|X_{K_j}| + |X_{K_{j+1}}|) \mathbf{1} \quad (26)$$

$$= x^\top H_j x + \varepsilon_1 \mathbf{1}^\top (|X_{K_j}| + |X_{K_{j+1}}|) \mathbf{1} \quad (27)$$

Here, (24) and (26) follow from the error bound,<sup>4</sup> and (27) follows from  $\text{tr}(G_j X_{K_j}) = x^\top H_j x$ . To see (25), note that  $K_{i+1}$  is optimal for  $\widehat{G}^i$  and we have:

$$\begin{aligned} \text{tr}(\widehat{G}^j X_{K_{j+1}}) &= \frac{j-1}{j} \text{tr}(\widehat{G}^{j-1} X_{K_{j+1}}) + \frac{1}{j} \text{tr}(\widehat{G}_j X_{K_{j+1}}) \\ &\leq \frac{j-1}{j} \text{tr}(\widehat{G}^{j-1} X_{K_j}) + \frac{1}{j} \text{tr}(\widehat{G}_j X_{K_j}) \\ &= \text{tr}(\widehat{G}^j X_{K_j}). \end{aligned}$$

Since  $\text{tr}(\widehat{G}^{j-1} X_{K_j}) \leq \text{tr}(\widehat{G}^{j-1} X_{K_{j+1}})$  it follows that  $\text{tr}(\widehat{G}_j X_{K_{j+1}}) \leq \text{tr}(\widehat{G}_j X_{K_j})$ .

Now note that we can rewrite  $\text{tr}(G_j X_{K_{j+1}})$  as a function of  $H_j$  as follows:

$$\begin{aligned} \text{tr}(G_j X_{K_{j+1}}) &= x^\top \begin{bmatrix} I & -K_{j+1}^\top \end{bmatrix} G_j \begin{bmatrix} I \\ -K_{j+1} \end{bmatrix} x \\ &= x^\top \begin{bmatrix} I & -K_{j+1}^\top \end{bmatrix} \left( \begin{bmatrix} A^\top \\ B^\top \end{bmatrix} H_j \begin{bmatrix} A & B \end{bmatrix} + \begin{bmatrix} M & 0 \\ 0 & N \end{bmatrix} \right) \begin{bmatrix} I \\ -K_{j+1} \end{bmatrix} x \\ &= x^\top \left( (A - BK_{j+1})^\top H_j (A - BK_{j+1}) \right) x + \text{tr} \left( \begin{bmatrix} M & 0 \\ 0 & N \end{bmatrix} X_{K_{j+1}} \right). \end{aligned}$$

Letting  $\Gamma_j = A - BK_j$ , we have that

$$x^\top \left( \Gamma_{j+1}^\top H_j \Gamma_{j+1} \right) x + \varepsilon_2 \leq x^\top H_j x \quad (28)$$

$$\text{where } \varepsilon_2 = x^\top (M + K_{j+1}^\top N K_{j+1}) x - \varepsilon_1 \mathbf{1}^\top (|X_{K_j}| + |X_{K_{j+1}}|) \mathbf{1}.$$

If the estimation error  $\varepsilon_1$  is small enough so that  $\varepsilon_2 > 0$  for any unit-norm  $x$  and all policies, then  $H_j \succ \Gamma_{j+1}^\top H_j \Gamma_{j+1}$  and  $K_{j+1}$  is stable by a Lyapunov theorem. Since  $K_1$  is stable and  $H_1$  bounded, all policies remain stable.

In order to have  $\varepsilon_2 > 0$ , it suffices to have

$$\varepsilon_1 < ((\sqrt{n} + \|K_j\| \sqrt{d})^2 + (\sqrt{n} + \|K_{j+1}\| \sqrt{d})^2)^{-1}.$$

This follows since  $M \succ I$ , and since for any unit norm vector  $x \in \mathbb{S}^n$ ,  $\mathbf{1}^\top x x^\top \mathbf{1} \leq n$ , with equality achieved by  $x = \frac{1}{\sqrt{n}} \mathbf{1}$ . Similarly,  $\mathbf{1}^\top K x x^\top K^\top \mathbf{1} \leq \|K\|^2 d$ , and  $\mathbf{1}^\top (|X_{K_j}|) \mathbf{1} \leq (\sqrt{n} + \|K_j\| \sqrt{d})^2$ .

As we will see, we need a smaller estimation error in phase  $j$ :

$$\varepsilon_1 < \frac{1}{6C_1 S} ((\sqrt{n} + \|K_j\| \sqrt{d})^2 + (\sqrt{n} + \|K_{j+1}\| \sqrt{d})^2)^{-1}. \quad (29)$$

Here,  $C_1$  is an upper bound on  $\|H_1\|$ ; note that  $H_1 \succ M \succ I$ , so  $C_1 > 1$ . The above condition guarantees that

$$\varepsilon_1 \mathbf{1}^\top (|X_{K_j}| + |X_{K_{j+1}}|) \mathbf{1} \leq \frac{1}{6C_1 S}.$$

We have that  $G_{1,22} \succ N \succ I$  and  $G_{1,21} = B^\top H_1 A$ . Given that the estimation error (10) is small, we have  $\|K_2\| \leq 2(\|B^\top H_1 A\| + 1) \leq C_K$ . Then (10) implies (29) for  $j = 1$ , and the above argument shows that  $K_2$  is stable.

Next, we show a bound on  $\|\Gamma_i^k\|$ . Let  $L_{i+1} = H_i^{1/2} \Gamma_{i+1} H_i^{-1/2}$ . By (28),  $M \succ I$ , and the error bound,

$$\begin{aligned} H_1 &\succ \Gamma_2^\top H_1 \Gamma_2 + (M + K_2^\top N K_2) - (6C_1 S)^{-1} I \\ I &\succ L_2^\top L_2 + H_1^{-1/2} (M + K_2^\top N K_2) H_1^{-1/2} - (6C_1 S)^{-1} H_1^{-1} \\ &\succ L_2^\top L_2 + H_1^{-1} - (6C_1)^{-1} I \end{aligned}$$

<sup>4</sup>Note that the elementwise max norm of a matrix satisfies  $\|G\|_{\max} \leq \|G\|_F$ .

$$\succ L_2^\top L_2 + (3C_1)^{-1}I - (6C_1)^{-1}I .$$

Thus,  $\|L_2\| \leq \sqrt{1 - (6C_1)^{-1}}$  and we have that

$$\|\Gamma_2^k\| = \left\| (H_1^{-1/2} L_2 H_1^{1/2})^k \right\| \leq \sqrt{C_1} (1 - (6C_1)^{-1})^{k/2} .$$

To show a uniform bound on value functions, we first note that

$$H_2 - H_1 \prec \Gamma_2^\top (H_2 - H_1) \Gamma_2 + (6C_1 S)^{-1} I .$$

Using the stability of  $\Gamma_2$ ,

$$\begin{aligned} H_2 - H_1 &\prec (6C_1 S)^{-1} \sum_{k=0}^{\infty} (\Gamma_2^\top)^k \Gamma_2^k \\ \|H_2\| &\leq \|H_1\| + \frac{C_1}{6C_1 S (1 - \|L_2\|^2)} \leq (1 + S^{-1}) C_1 . \end{aligned}$$

Thus  $C_2 \leq (1 + S^{-1}) C_1$ , and by repeating the same argument,

$$C_i \leq (1 + S^{-1})^i C_1 \leq 3C_1 . \quad (30)$$

□

## C Regret bound

In this section, we prove Lemma 5.2 by bounding  $\beta_T$ ,  $\gamma_T$ , and  $\alpha_T$ .

### C.1 Bounding $\beta_T$

Because we use FTL as our expert algorithm and value functions are quadratic, we can use the following regret bound for the FTL algorithm (Theorem 3.1 in (Cesa-Bianchi and Lugosi, 2006)).

**Theorem C.1** (FTL Regret Bound). *Assume that the loss function  $f_t(\cdot)$  is convex, is Lipschitz with constant  $F_1$ , and is twice differentiable everywhere with Hessian  $H \succ F_2 I$ . Then the regret of the Follow The Leader algorithm is bounded by*

$$B_T \leq \frac{F_1^2}{2F_2} (1 + \log T) .$$

Because we execute  $S$  policies, each for  $\tau = T/S$  rounds (where  $\tau = T^{2/3+\xi}$  and  $\tau = T^{3/4}$  for MFLQv1 and MFLQv2, respectively),

$$\begin{aligned} \beta_T &= \sum_{i=1}^S \tau \mathbf{E}_{x \sim \mu_\pi} (Q_i(x, \pi_i(x)) - Q_i(x, \pi(x))) \\ &= \tau \sum_{i=1}^S \left( \mathbf{E}_{x \sim \mu_\pi} (\widehat{Q}_i(x, \pi_i(x)) - \widehat{Q}_i(x, \pi(x))) \right. \\ &\quad \left. + \mathbf{E}_{x \sim \mu_\pi} (Q_i(x, \pi_i(x)) - \widehat{Q}_i(x, \pi_i(x))) \right. \\ &\quad \left. + \mathbf{E}_{x \sim \mu_\pi} (\widehat{Q}_i(x, \pi(x)) - Q_i(x, \pi(x))) \right) \\ &\leq C' \sqrt{ST} \log T + \tau \sum_{i=1}^S \mathbf{E}_{x \sim \mu_\pi} (\widehat{Q}_i(x, \pi_i(x)) - \widehat{Q}_i(x, \pi(x))) , \end{aligned}$$

where the last inequality holds by Lemma 4.2. Consider the remaining term:

$$E_T = \tau \sum_{i=1}^S \mathbf{E}_{x \sim \mu_\pi} (\widehat{Q}_i(x, \pi_i(x)) - \widehat{Q}_i(x, \pi(x))) .$$

We bound this term using the FTL regret bound. We show that the conditions of Theorem C.1 hold for the loss function  $f_i(K) = \mathbf{E}_{x \sim \mu_\pi}(\widehat{Q}_i(x, Kx))$ . Let  $\Sigma_\pi$  be the covariance matrix of the steady-state distribution  $\mu_\pi(x)$ . We have that

$$\begin{aligned} f_i(K) &= \text{tr} \left( \Sigma_\pi (\widehat{G}_{i,11} - K^\top \widehat{G}_{i,21} - \widehat{G}_{i,12}K + K^\top \widehat{G}_{i,22}K) \right) \\ \nabla_K f_i(K) &= 2\Sigma_\pi (K^\top \widehat{G}_{i,22} - \widehat{G}_{i,12}) \\ &= 2\text{MAT}((\widehat{G}_{i,22} \otimes \Sigma_\pi) \text{VEC}(K)) - 2\Sigma_\pi \widehat{G}_{i,12} \\ \nabla_{\text{VEC}(K)}^2 f_i(K) &= 2\widehat{G}_{i,22} \otimes \Sigma_\pi. \end{aligned}$$

Boundedness and Lipschitzness of the loss function  $f_i(K_i)$  follow from the boundedness of policies  $K_i$  and value matrix estimates  $\widehat{G}_i$ . By Lemma 5.1, we have that  $\|K_i\| \leq C_K$ . To bound  $\|\widehat{G}_i\|$ , note that

$$\begin{aligned} G_i &= \begin{pmatrix} A^\top \\ B^\top \end{pmatrix} H_i \begin{pmatrix} A & B \end{pmatrix} + \begin{pmatrix} M & 0 \\ 0 & N \end{pmatrix} \\ \|G_i\| &\leq C_H(\|A\| + \|B\|)^2 + \|M\| + \|N\| && \text{(Lemma 5.1)} \\ \|\widehat{G}_i\| &\leq \|G_i\| + \varepsilon_1 \sqrt{n+d} && \text{(Lemma 4.2)}. \end{aligned}$$

The Hessian lower bound is  $\nabla_{\text{VEC}(K)}^2 f_i(K) \succ F_2 I$ , where  $F_2$  is given by two times the product of the minimum eigenvalues of  $\Sigma_\pi$  and  $\widehat{G}_{i,22}$ . For any stable policy  $\pi(x) = Kx$ , the covariance matrix of the stationary distribution satisfies  $\Sigma_\pi \succ W$ , and we project the estimates  $\widehat{G}_i$  onto the constraint  $\widehat{G}_i \succeq \begin{pmatrix} M & 0 \\ 0 & N \end{pmatrix}$ . Therefore the Hessian of the loss is lower-bounded by  $2\lambda_{\min}(W)I$ . By Theorem C.1,  $E_T \leq \tau \log S = C'' \tau \log T$  for an appropriate constant  $C''$ .

## C.2 Bounding $\gamma_T$

In this section, we bound the average cost of following a stable policy,  $\gamma_T = \sum_{t=1}^T (\lambda_\pi - c(x_t, \pi(x_t)))$ . Recall that the instantaneous and average costs of following a policy  $\pi(x) = -Kx$  can be written as

$$c(x_t, \pi(x_t)) = x_t^\top (M + K^\top N K) x_t \quad (31)$$

$$\lambda_\pi = \text{tr}(\Sigma_\pi (M + K^\top N K)), \quad (32)$$

where  $\Sigma_\pi$  is the steady-state covariance of  $x_t$ . Let  $\Sigma_t$  be the covariance of  $x_t$ , let  $D_t = \Sigma_t^{1/2} (M + K^\top N K) \Sigma_t^{1/2}$ , and let  $\lambda_t = \text{tr}(D_t)$ . To bound  $\gamma_T$ , we start by rewriting the cost terms as follows:

$$\lambda_\pi - c(x_t, \pi(x_t)) = \lambda_\pi - \lambda_t + \lambda_t - c(x_t^\pi, \pi(x_t^\pi)) \quad (33)$$

$$= \text{tr}((\Sigma_\pi - \Sigma_t)(M + K^\top N K)) + (\text{tr}(D_t) - u_t^\top D_t u_t) \quad (34)$$

where  $u_t \sim \mathcal{N}(0, I_n)$  is a standard normal vector.

To bound  $\text{tr}((\Sigma_\pi - \Sigma_t)(M + K^\top N K))$ , note that  $\Sigma_\pi = \Gamma \Sigma_\pi \Gamma^\top + W$  and  $\Sigma_t = \Gamma \Sigma_{t-1} \Gamma^\top + W$ . Subtracting the two equations and recursing,

$$\Sigma_\pi - \Sigma_t = \Gamma(\Sigma_\pi - \Sigma_{t-1})\Gamma^\top = \Gamma^t(\Sigma_\pi - \Sigma_0)(\Gamma^t)^\top. \quad (35)$$

Thus,

$$\sum_{t=0}^T \text{tr}((M + K^\top N K)(\Sigma_\pi - \Sigma_t)) = \sum_{t=0}^T \text{tr}((M + K^\top N K)\Gamma^t(\Sigma_\pi - \Sigma_0)(\Gamma^t)^\top) \quad (36)$$

$$\leq \text{tr}(\Sigma_\pi - \Sigma_0) \text{tr} \left( \sum_{t=0}^{\infty} (\Gamma^t)^\top (M + K^\top N K) \Gamma^t \right) \quad (37)$$

$$= \text{tr}(\Sigma_\pi - \Sigma_0) \text{tr}(H_\pi). \quad (38)$$

Let  $U$  be the concatenation of  $u_1, \dots, u_T$ , and let  $D$  be a block-diagonal matrix constructed from  $D_1, \dots, D_T$ . To bound the second term, note that by the Hanson-Wright inequality

$$\begin{aligned} \mathbf{P} \left( \left| \sum_{t=1}^T u_t^\top D_t u_t - \text{tr} D_t \right| > s \right) &= \mathbf{P} (|U^\top D U - \text{tr} D| > s) \\ &\leq 2 \exp \left( -c \min \left( \frac{s^2}{\|D\|_F^2}, \frac{s}{\|D\|} \right) \right). \end{aligned} \quad (39)$$

Thus with probability at least  $1 - \delta$  we have

$$\begin{aligned} \left| \sum_{t=1}^T u_t^\top D_t u_t - \text{tr}(D_t) \right| &\leq \|D\|_F \sqrt{\ln(2/\delta)/c} + \|D\| \ln(2/\delta)/c \\ &\leq \sqrt{\sum_{t=1}^T \|D_t\|_F^2} \sqrt{\ln(2/\delta)/c} + \max_t \|D_t\| \ln(2/\delta)/c \end{aligned} \quad (40)$$

where  $c$  is a universal constant. Given that for all  $t$ ,

$$\begin{aligned} \|D_t\| &\leq \text{tr}(D_t) \\ &= \text{tr}((M + K^\top N K)(\Sigma_\pi + \Gamma^t(\Sigma_0 - \Sigma_\pi)(\Gamma^T)^t)) \\ &\leq \lambda_\pi, \end{aligned}$$

with probability at least  $1 - \delta$ ,

$$\sum_{t=1}^T c(x_t^\pi, \pi(x_t^\pi)) - \lambda_t \leq \lambda_\pi \left( \sqrt{T \ln(2/\delta)/c} + \ln(2/\delta)/c \right). \quad (41)$$

Thus, we can bound  $\gamma_T$  as

$$\gamma_T \leq \text{tr}(H_\pi) \text{tr}(\Sigma_\pi) + \lambda_\pi \left( \sqrt{T \ln(2/\delta)/c} + \ln(2/\delta)/c \right). \quad (42)$$

### C.3 Bounding $\alpha_T$

To bound  $\alpha_T = \sum_{t=1}^T (c(x_t, a_t) - \lambda_{\pi_t})$ , in addition to bounding the cost of following a policy, we need to account for having  $S$  policy switches, as well as the cost of random actions. Let  $I_a$  be the set of time indices of all random actions  $a \sim \mathcal{N}(0, \Sigma_a)$ . Using the Hanson-Wright inequality, with probability at least  $1 - \delta$ ,

$$\sum_{t \in I_a} |a_t^\top N a_t - \text{tr}(\Sigma_a N)| \leq \|\Sigma_a N\|_F \sqrt{|I_a| \ln(2/\delta)/c_1} + \|\Sigma_a N\| \ln(2/\delta)/c_1. \quad (43)$$

Let  $D_{i,t} = \Sigma_t^{1/2} (M + K_i^\top N K_i) \Sigma_t^{1/2}$ , and let  $\lambda_{i,t} = \text{tr}(D_{i,t})$ . Let  $I_i$  be the set of time indices corresponding to following policy  $\pi_i$  in phase  $i$ . The corresponding cost can be decomposed similarly to  $\gamma_T$ :

$$\sum_{i=1}^S \sum_{t \in I_i} c(x_t, \pi_i(x_t)) - \lambda_{\pi_i} = \sum_{i=1}^S \sum_{t \in I_i} \text{tr}((\Sigma_t - \Sigma_{\pi_i})(M + K_i^\top N K_i) + (u_t^\top D_{i,t} u_t - \text{tr}(D_{i,t}))). \quad (44)$$

Let  $D_{\max} \geq \max_{i,t} \|D_{i,t}\|$ . Similarly to the previous section, with probability at least  $1 - \delta$  we have

$$\left| \sum_{i=1}^S \sum_{t \in I_i} u_t^\top D_{i,t} u_t - \text{tr}(D_{i,t}) \right| \leq D_{\max} \sqrt{T n \ln(2/\delta)/c_2} + D_{\max} \ln(2/\delta)/c_2. \quad (45)$$

At the beginning of each phase  $i$ , the state covariance is  $\Sigma_{\pi_{i-1}}$  (and we define  $\Sigma_{\pi_0} = W$ ). After following  $\pi_i$  for  $T_v$  steps,

$$\sum_{i=1}^S \sum_{t \in I_i} \text{tr}((\Sigma_t - \Sigma_{\pi_i})(M + K_i^\top N K_i)) = \sum_{i=1}^S \sum_{k=0}^{T_v-1} \text{tr}((\Sigma_{\pi_{i-1}} - \Sigma_{\pi_i})(\Gamma_i^k)^\top (M + K_i^\top N K_i) \Gamma_i^k)$$

$$\begin{aligned} &\leq \sum_{i=1}^S \text{tr}(H_i) \text{tr}(\Sigma_{\pi_{i-1}}) \\ &\leq SnC_H \max_i \text{tr}(\Sigma_{\pi_i}) \end{aligned}$$

Following each random action, the state covariance is  $\Sigma_{G,i} = A\Sigma_{\pi_i}A^\top + B\Sigma_aB^\top + W$ . After taking a random action and following  $\pi_i$  for  $T_s$  steps, we have

$$\sum_{k=0}^{T_s} \text{tr}((\Sigma_{G,i} - \Sigma_{\pi_i})(\Gamma_i^k)^\top (M + K_i^\top NK_i)\Gamma_i^k) \leq \text{tr}(\Sigma_{G,i}) \text{tr}(H_i) \leq nC_H(\text{tr}(B\Sigma_aB^\top) + \|A\|^2 \text{tr}(\Sigma_{\pi_i})).$$

Putting everything together, we have

$$\begin{aligned} \alpha_t &\leq \|\Sigma_a N\|_F \sqrt{|I_a| \ln(2/\delta)/c_1} + \|\Sigma_a N\| \ln(2/\delta)/c_1 \\ &\quad + D_{\max} \sqrt{Tn \ln(2/\delta)/c_2} + D_{\max} \ln(2/\delta)/c_2 \\ &\quad + SnC_H \max_i \text{tr}(\Sigma_{\pi_i}) \\ &\quad + |I_a| nC_H (\text{tr}(B\Sigma_aB^\top) + \|A\|^2 \max_i \text{tr}(\Sigma_{\pi_i})) \end{aligned}$$

where in v1  $S = T^{1/3-\xi}$  and  $|I_a| = O(T^{2/3+\xi})$ , while in v2  $S = T^{1/4}$  and  $|I_a| = T^{3/4+\xi}$ . We bound  $\max_i \text{tr}(\Sigma_{\pi_i})$  and  $\|D_{i,t}\|$  in C.3.1.

### C.3.1 State covariance bound

We bound  $\max_i \text{tr}(\Sigma_{\pi_i})$  using the following equation for the average cost of a policy:

$$\begin{aligned} \text{tr}(\Sigma_{\pi_i}(M + K_i^\top NK_i)) &= \text{tr}(H_i W) \\ \text{tr}(\Sigma_{\pi_i}) &\leq \|H_i\| \text{tr}(W)/\lambda_{\min}(M) \\ \max_i \text{tr}(\Sigma_{\pi_i}) &\leq C_H \text{tr}(W)/\lambda_{\min}(M). \end{aligned}$$

To bound  $\|D_{i,t}\|$ , we note that

$$\begin{aligned} \|D_{i,t}\| &\leq \text{tr}(D_{i,t}) = \text{tr}(\Sigma_t(M + K_i^\top NK_i)) \\ &\leq \text{tr}(\Sigma_t)(\|M\| + C_K^2 \|N\|), \end{aligned}$$

and bound the state covariance  $\text{tr}(\Sigma_t)$ . After starting at distribution  $\mathcal{N}(0, \Sigma_0)$  and following a policy  $\pi_i$  for  $t$  steps, the state covariance is

$$\begin{aligned} \Sigma_t &= \Gamma_i \Sigma_{t-1} \Gamma_i^\top + W \\ &= \Gamma_i^t \Sigma_0 \Gamma_i^{t\top} + \sum_{k=0}^{t-1} \Gamma_i^k W \Gamma_i^{k\top} \\ &\prec \Sigma_0 + \Sigma_{\pi_i}. \end{aligned}$$

The initial covariance  $\Sigma_0$  is close to  $\Sigma_{\pi_{i-1}}$  after a policy switch, and close to  $A\Sigma_{\pi_i}A^\top + B\Sigma_aB^\top + W$  after a random action. Therefore we can bound the state covariance in each phase as

$$\begin{aligned} \Sigma_t &\leq \Sigma_{\pi_i} + \Sigma_{\pi_{i-1}} + A\Sigma_{\pi_i}A^\top + B\Sigma_aB^\top \\ \text{tr}(\Sigma_t) &\leq (2 + \|A\|^2) \max_i \text{tr}(\Sigma_{\pi_i}) + \text{tr}(B\Sigma_aB^\top) \\ &\leq (2 + \|A\|^2) C_H \text{tr}(W)/\lambda_{\min}(M) + \text{tr}(B\Sigma_aB^\top). \end{aligned}$$
